# Supplementary material for: Comparing the effectiveness of different modes of exercise snacks in improving muscle and cardiorespiratory fitness in physically inactive college students
Source: Research Square preprint supplement (doi:10.21203/rs.3.rs-6760233/v1), 2025-10-15
Supplement: Supplementary file 1 [file 1262fd500d1bf0b9b38ea402.xlsx]

## Sheet: Sheet1
Number	Group	Name	Age	Height(cm)	Gender	PRE	BMI	Body Fat(%)	Weight	POST	BMI	Body Fat(%)	Weight	PRE	PP	AP	MinP	max speed(rmp)	total energy produced(J)	POST	PP	AP	MinP	max speed(rmp)	total energy produced(J)	PRE	30°/s isometric extensor strength	60°/s isokinetic extensor strength	60°/s isokinetic flexor strength	300°/s isokinetic extensor strength	300°/s isokinetic flexor strength	POST	30°/s isometric extensor strength	60°/s isokinetic extensor strength	60°/s isokinetic flexor strength	300°/s isokinetic extensor strength	300°/s isokinetic flexor strength	PER	vo2peak	POST	vo2peak
1	RES	*	20.1	171	male		23.5	25.4	68.9		22.9	22.3	67	peak power(PP)	571.43	427.39	236.64	100.42	12541		649.38	424.06	226.22	114.96	12491		134	152	118	75	69		157	171	130	87	77	Peak oxygen uptake(VO2peak)	1.78		1.97
2	RES	*	18.94	181	male		23.3	16.6	76.3		23	19.3	75.5	average power(AP)	782.29	589.89	364.41	121.38	16571		988.42	682.54	360.57	147.53	20031		195	214	133	87	79		205	232	138	115	84		2.86		3
3	RES	*	19.77	163	female		21.8	33	58		21.4	31.4	57	Minimum power(MinP)	380.25	302.44	225.17	84.12	9005		397.07	291.92	203.38	83.48	8570		71	106	75	43	46		111	123	81	60	57		1.5		1.75
4	RES	*	20.08	161	female		22.6	32.7	58.5		22.2	30.4	57.5		447.92	381.78	148.38	100.15	11039		560.47	437.37	201.37	120.46	12827		100	122	68	49	37		96	122	79	57	46		1.67		1.86
5	RES	*	20	166	male		24	30	66.5		23	29.4	63.9		641.14	463.25	331.41	114.45	13682		691.2	527.14	359.85	130.52	15522		186	170	83	81	58		175	179	111	91	72		2.5		2.8
6	RES	*	18.8	158	male		22.1	18.9	54.5		21.3	17.4	52.7		458.22	349.36	270.92	95.29	10645		658.42	452.88	333.12	133.84	13693		85	102	79	77	66		117	123	92	84	69		2.32		2.46
7	RES	*	19.38	157	female		19	27.3	47		18.8	27.6	46.7		397.41	308.63	200.77	105.98	8985		496.39	340.33	187.59	119.64	9929		76	80	58	41	31		88	89	69	54	45		1.43		1.62
8	RES	*	19.01	181	male		21.7	19.6	71.5		21.2	18.9	69.9		797.22	473.78	216.88	121.66	13338		808.8	540.74	260.32	130.77	15686		115	152	140	95	95		138	184	123	114	77		2.8		2.8
9	RES	*	19.49	176	male		19.8	19.1	61.2		20.2	18.9	62.6		643.54	414.93	250.5	117.96	12266		865.58	532.35	291.83	145.36	15645		160	203	115	84	76		188	221	130	98	91		2.09		2.75
10	RES	*	21.17	190	male		19.5	10.4	70.3		19.3	11.5	69.7		925.61	600.81	334.12	144.28	17310		1014.97	663.01	315.29	160.31	19071		151	191	132	77	77		202	201	149	106	89		2.46		2.42
11	RES	*	20.22	170	male		22.2	13.2	64.1		22.7	12.5	65.6		798.28	553.2	335.86	136.57	6649		961.34	607.16	368.58	161.54	17830		220	213	157	111	89		228	214	161	96	79		2.69		2.57
12	BES	*	20.46	190	male		20.7	6.9	74.6		21	8.5	76		871.13	603.09	397.87	136.07	17553		963.46	683.82	441.77	145.86	20111		170	233	127	104	111		183	218	140	130	117		2.9		3.24
13	BES	*	20.37	180	male		24	15.2	77.7		24	15.8	77.7		818.06	586.21	329.74	130.12	16827		1007.42	669.78	411.7	144.08	19551		140	191	119	100	76		164	205	141	104	83		2.71		3.23
14	BES	*	19.4	157	female		23.5	35.8	58		22.8	34.1	56.1		350.39	259.63	175.62	157.64	7779		374.05	293.59	221.9	144.78	8798		107	106	58	52	39		107	107	71	52	49		1.49		1.64
15	BES	*	19.13	173	male		19.4	7	57.9		19.6	14	58.7		572.98	421.85	310.87	112.82	12699		683.59	528.95	379.1	134.05	15939		95	125	92	69	65		114	141	99	87	84		2.07		2.36
16	BES	*	19.19	179	male		18.2	7.2	58.3		18.1	10.4	58		661.24	451.37	289.91	116.1	13434		754.41	507.51	347.86	143.13	15306		95	146	84	56	46		123	167	113	89	61		2.26		2.98
17	BES	*	18.94	177	male		21.2	17.1	66.4		20.5	15.1	64.1		571.13	445.45	238.45	105.45	12844		623.89	493.73	291.85	111.45	14400		94	167	113	72	76		122	187	117	94	91		2.11		2.52
18	BES	*	19.27	180	male		23.9	23.9	77.3		23.5	19.6	78		983.55	673.8	355.18	147.6	19130		1061	740.44	461.5	157.47	21588		205	188	133	91	71		193	180	137	102	89		3.27		3.1
19	BES	*	18.98	151	female		23.5	34	53.2		23.4	35.7	53.5		459.09	340.42	185.2	100.75	9681		441.16	370.71	260.11	104.24	11199		61	104	66	50	42		88	115	71	58	46		1.69		2.01
20	BES	*	20.1	168	male		24.6	23.3	69.5		24.9	23.3	70.5		812.77	516.82	337.52	129.75	15284		793.08	560.74	397.97	129.14	15284		118	137	103	80	58		110	125	98	89	77		2.81		2.74
21	BES	*	20.1	171	male		24.2	24.2	70.8		24.8	23.5	72.6		796.92	576.3	399.87	131.4	16772		928.34	665.65	378.17	144.53	19548		157	153	99	88	66		146	164	107	108	73		2.49		2.3
22	MES	*	19.18	168	male		22.3	15.2	63		21.4	12.8	60.3		820.56	495.27	287.56	136.41	14045		792.13	559.91	305.65	139.67	16482		156	165	107	69	66		163	188	119	87	81		2.12		2.5
23	MES	*	20.72	168	male		23.5	23.1	66.5		23.2	25.7	65.8		637.94	462.14	295.23	116.02	13494		855.81	543.79	270.92	144.24	15625		56	115	85	68	57		123	163	103	92	69		2.24		2.43
24	MES	*	19.57	171	male		21	15.5	62.8		22.2	19.2	65		590.91	429.04	293.93	112.76	12461		693.11	527.5	377.86	125.94	15756		184	155	110	80	80		199	186	122	85	75		1.9		2.49
25	MES	*	20.16	178	male		20.3	15.8	64.3		20.3	16.3	64.3		782.75	514.23	329.38	131.5	15248		851.9	583.6	361.44	143.77	17324		179	193	122	98	77		194	209	132	95	84		2.09		2.54
26	MES	*	20.29	176	male		20.9	17.2	64.7		21.7	15.7	67.2		813.45	588.35	430.9	143.1	17168		904.73	624.75	392.78	150.88	18463		163	172	129	106	91		179	195	138	118	91		2.9		3.28
27	MES	*	19.5	187	male		20	9.5	70.4		20.3	8	71.4		623.89	493.73	291.85	111.45	14400		804.01	578.37	301.52	137.07	16717		188	174	107	81	62		201	182	122	84	71		2.62		2.75
28	MES	*	18.48	172	male		18.9	14.6	55.9		18.4	13	54.3		660.62	435.08	187.73	124.71	12275		728.92	535.77	328.17	150.66	15953		102	113	104	60	56		127	152	126	79	73		2.37		2.71
29	MES	*	19.49	167	male		21.3	15.9	59.3		20.6	13.9	57.5		588.15	438.9	189.49	117.71	12285		900.74	512.52	143.38	156.35	14635		104	126	85	77	56		140	155	108	98	68		2.46		2.7
30	MES	*	18.88	182	male		22.4	20.9	74.3		21.7	20.3	72		831.73	517.52	235.6	126.08	14735		981.32	642.36	297.24	153.52	18181		144	184	99	84	77		152	197	123	99	84		2.62		2.7
31	MES	*	23.15	164	female		19.4	17	52.1		19.3	17.6	51.8		471.51	377.94	282.08	109.97	11396		594.93	405.55	262.5	126.16	11826		96	141	71	71	43		108	153	96	75	66		1.76		2
RES=Resistance exercise snacks
BES=Bicycle exercise snacks
MES=Mixed exercise snacks
